# Supplementary material
Source: PubMed Central journal article supplement (PMC2699564)
Supplement: NIHMS91505-supplement-1_si_001.pdf [file NIHMS91505-supplement-1_si_001.pdf]

## Supporting Information

---

### **Comparative Positron-Emission Tomography (PET) Imaging and Phototherapeutic Potential of <sup>124</sup>I- Labeled Methyl- 3-(1'-iodobenzyloxyethyl) pyropheophorbide-a vs. the Corresponding Glucose- and Galactose-Conjugates**

Suresh K. Pandey<sup>1</sup>, Munawwar Sajjad<sup>3,\*</sup>, Yihui Chen<sup>1</sup>, Xiang Zheng<sup>1</sup>, Rutao Yao<sup>3</sup>, Joseph R. Missert<sup>1</sup>, Carrie Batt<sup>1</sup>, Hani A. Nabi<sup>3</sup>, Allan R. Oseroff<sup>2</sup> and Ravindra K. Pandey<sup>1,\*</sup>

<sup>1</sup>PDT Center, <sup>2</sup>Department of Dermatology, Roswell Park Cancer Institute, Buffalo, NY 14263

<sup>3</sup>Department of Nuclear Medicine, State University of New York, Buffalo, NY 14214

---

#### ***Contents:***

|     |                                                                         |
|-----|-------------------------------------------------------------------------|
| S1  | Title page                                                              |
| S2  | NMR spectrum of compound <b>1</b>                                       |
| S3  | NMR spectrum of compound <b>12</b> (trimethyltin analog of <b>1</b> )   |
| S4  | NMR spectrum of compound <b>2</b>                                       |
| S5  | H NMR spectrum of compound <b>9</b> (trimethyltin analog of <b>2</b> )  |
| S6  | H NMR spectrum of compound <b>6</b>                                     |
| S7  | H NMR spectrum of compound <b>10</b> (trimethyltin analog of <b>6</b> ) |
| S8  | H NMR spectrum of compound <b>3</b>                                     |
| S9  | H NMR spectrum of compound <b>12</b> (trimethyltin analog of <b>3</b> ) |
| S10 | Analytical details of compounds <b>1-12</b> .                           |





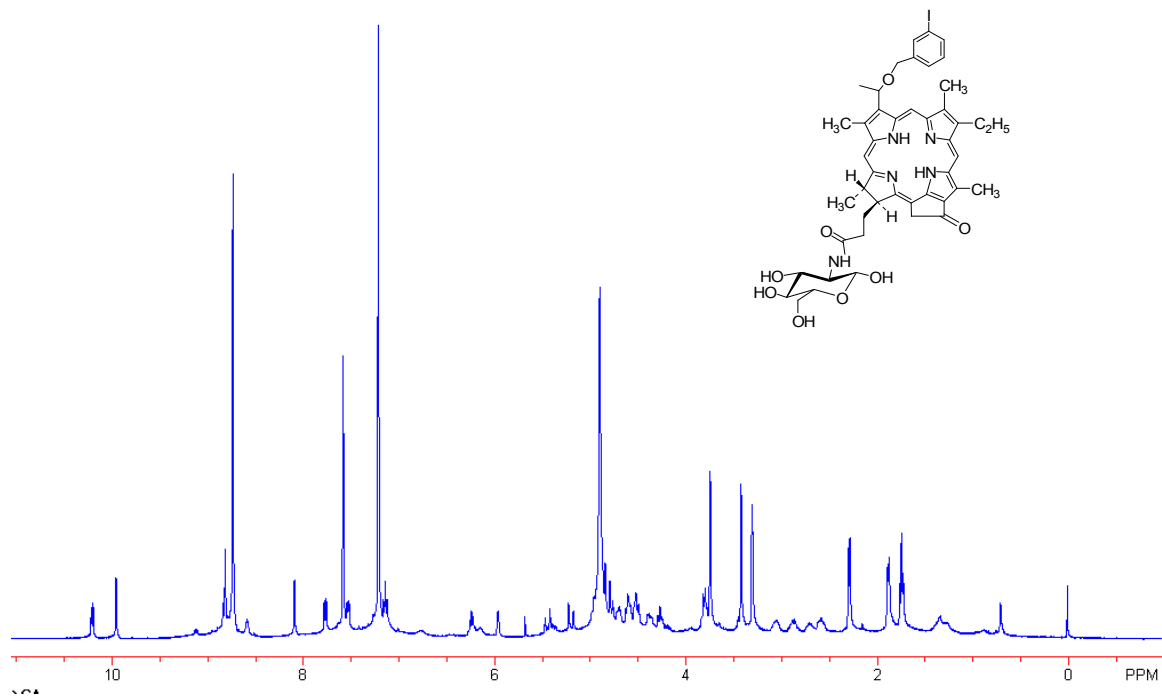

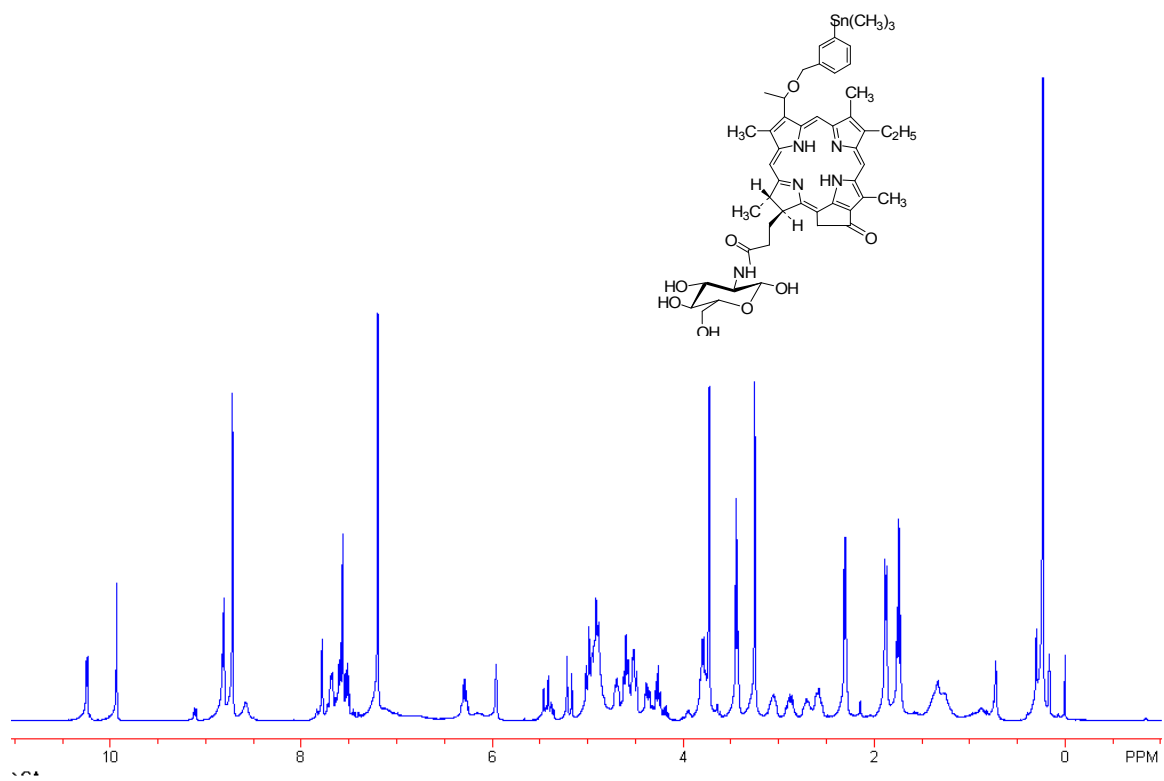

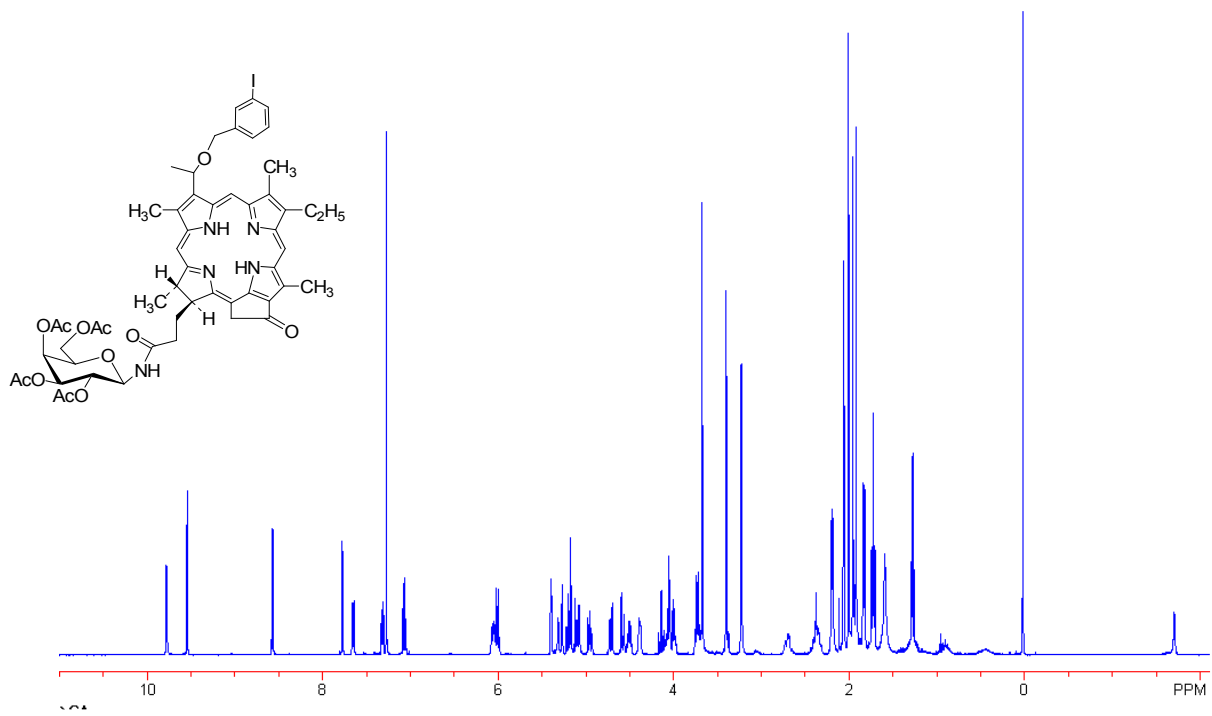

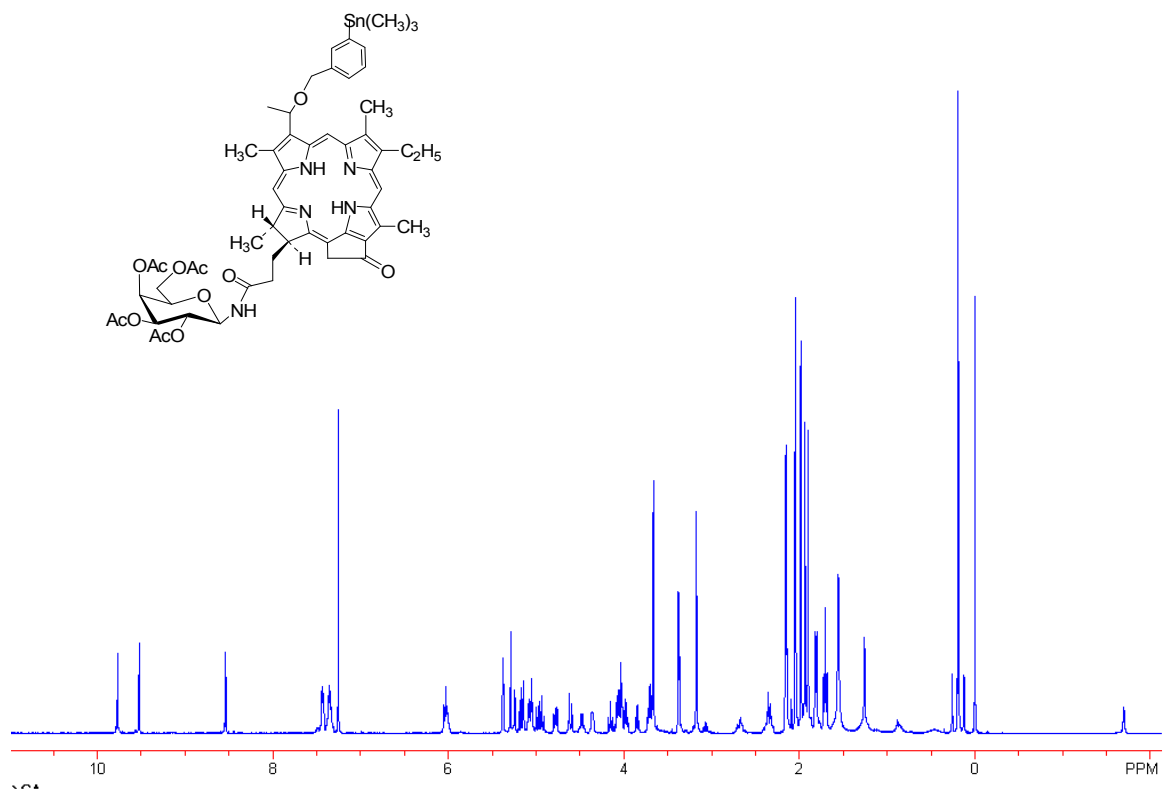

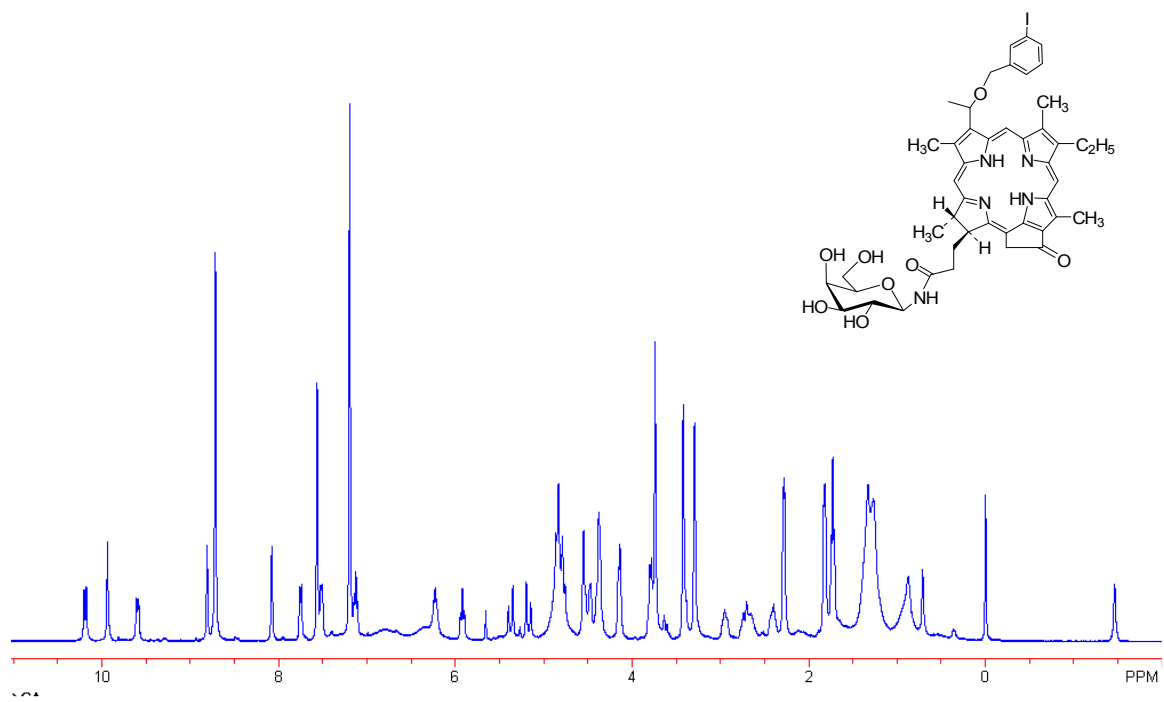



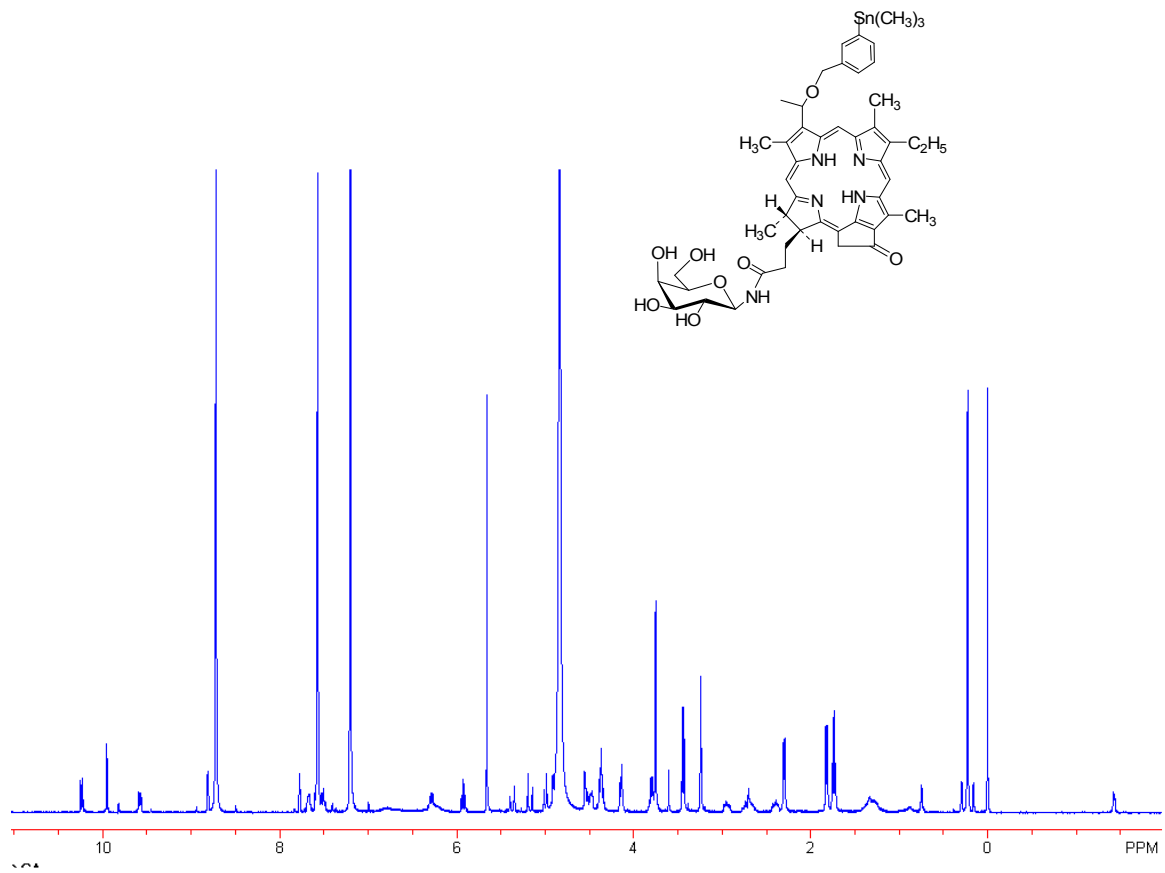

### Analytical Details

| Compound No. | Mol. Formula                                                      | HRMS                                                                                                             | HPLC Analysis                                 | Does the analysis agree to the desired product |
|--------------|-------------------------------------------------------------------|------------------------------------------------------------------------------------------------------------------|-----------------------------------------------|------------------------------------------------|
| 1            | C <sub>41</sub> H <sub>43</sub> N <sub>4</sub> O <sub>4</sub> I   | Analysis calcd:<br>C, 62.91; H, 5.54;<br>N, 7.16, I, 16.21<br>Found: C, 62.60;<br>H, 5.59; N, 7.13,<br>I, 16.45. | RT: 20.97 min<br>Purity: 96%                  | Yes<br>NMR: See the<br>Expt. Section           |
| 2            | C <sub>46</sub> H <sub>52</sub> N <sub>5</sub> O <sub>8</sub> I   | Calcd: 929.2862<br>Found (M+1):<br>930.2854                                                                      | RT: 8.17 min<br>Purity: >96%                  | Yes<br>NMR: See the<br>Expt. Section           |
| 3            | C <sub>46</sub> H <sub>52</sub> N <sub>5</sub> O <sub>8</sub> I   | Calcd: 929.2862<br>Found (M+1):<br>930.2806                                                                      | RT: 8.02 min<br>Purity: >96%                  | Yes<br>NMR: See the<br>Expt. Section           |
| 4            | C <sub>40</sub> H <sub>41</sub> N <sub>4</sub> O <sub>4</sub> I   | Calcd: 768.2174<br>Found (M+1):<br>769.2207                                                                      | Intermediate                                  | Yes<br>NMR: See the<br>Expt. Section           |
| 5            | C <sub>44</sub> H <sub>44</sub> N <sub>5</sub> O <sub>6</sub> I   | Calcd: 865.2328<br>Found (M+1):<br>866.2312                                                                      | Intermediate                                  | Yes<br>NMR: See the<br>Expt. Section           |
| 6            | C <sub>54</sub> H <sub>60</sub> N <sub>5</sub> O <sub>12</sub> I  | Calcd: 1097.3284<br>Found (M+1):<br>1098.3277                                                                    | Intermediate                                  | Yes<br>NMR: See the<br>Expt. Section           |
| 7            | C <sub>43</sub> H <sub>50</sub> N <sub>4</sub> O <sub>4</sub> Sn  | Calcd: 806.2853<br>Found (M+1):<br>807.2848                                                                      | Intermediate                                  | Yes<br>NMR: See the<br>Expt. Section           |
| 8            | C <sub>47</sub> H <sub>53</sub> N <sub>5</sub> O <sub>6</sub> Sn  | Calcd: 903.3017<br>Found (M+1):<br>904.3009                                                                      | Intermediate                                  | Yes<br>NMR: See the<br>Expt. Section           |
| 9            | C <sub>49</sub> H <sub>61</sub> N <sub>5</sub> O <sub>8</sub> Sn  | Calcd: 967.3541<br>Found (M+1):<br>968.3534                                                                      | Intermediate<br>RT: 10.51 min<br>Purity: >96% | Yes<br>NMR: See the<br>Expt. Section           |
| 10           | C <sub>57</sub> H <sub>69</sub> N <sub>5</sub> O <sub>12</sub> Sn | Calcd: 1135.3964<br>Found (M+1):<br>1136.3786                                                                    | Intermediate                                  | Yes<br>NMR: See the<br>Expt. Section           |
| 11           | C <sub>49</sub> H <sub>61</sub> N <sub>5</sub> O <sub>8</sub> Sn  | Calcd: 967.3541<br>Found (M+1):<br>968.3542                                                                      | Intermediate<br>RT: 9.88 min<br>Purity: >96%  | Yes<br>NMR: See the<br>Expt. Section           |
| 12           | C <sub>45</sub> H <sub>52</sub> N <sub>4</sub> O <sub>4</sub> Sn  | Analysis calcd:<br>C, 64.99; H, 6.30;<br>N, 6.74<br>Found: C, 64.56;<br>H, 6.66; N, 6.59.                        | Intermediate<br>RT: 27.88 min<br>Purity: >96% | Yes<br>NMR: See the<br>Expt. Section           |
